# Supplementary material for: Inverse Molecular Docking as a Novel Approach to Study Anticarcinogenic and Anti-Neuroinflammatory Effects of Curcumin
Source: PubMed Central journal article supplement (PMC6321024; doi:10.3390/molecules23123351), 2018-12-18
Supplement: molecules-23-03351-s001.pdf [file molecules-23-03351-s001.pdf]

## Supplementary material

# Inverse Molecular Docking as a Novel Approach to Study Anticarcinogenic and Anti-Neuroinflammatory Effects of Curcumin

Veronika Furlan,<sup>1</sup> Janez Konc,<sup>\*2</sup> Urban Bren<sup>\*,1,2</sup>

<sup>1</sup>Faculty of Chemistry and Chemical Technology, University of Maribor, Smetanova 17, SI-2000 Maribor, Slovenia; veronika.furlan@um.si

<sup>2</sup>National Institute of Chemistry, Hajdrihova 19, SI-1000, Ljubljana

\*Correspondence: janez.konc@ki.si; Phone: +386-1-476 0273; urban.bren@um.si; Phone: +386-2-229 4421.

**Table S1.** Details for FR- $\beta$ -curcumin interactions identified by PLIP.

| Hydrogen bonds               |                     |           |               |
|------------------------------|---------------------|-----------|---------------|
| Residue                      | Distance D-H--A (Å) | Angle (°) | H-bond donor? |
| APS 97                       | 0.88                | 155.72    | No            |
| HIS 151                      | 0.82                | 145.33    | No            |
| ARG 152                      | 0.78                | 136.90    | Yes           |
| ARG 152                      | 0.68                | 129.84    | No            |
| SER 190                      | 0.95                | 169.07    | Yes           |
| $\pi$ -Stacking interactions |                     |           |               |
| Residue                      | Distance (Å)        | Angle (°) | Type          |
| TYR 101                      | 4.32                | 4.35      | P             |
| TRP 187                      | 3.96                | 28.59     | P             |
| TRP 187                      | 4.12                | 27.53     | P             |

\*D – donor, A – acceptor, P - parallel.

**Table S2.** Details for PDE4D-curcumin interactions identified by PLIP.

| Hydrogen bonds           |                     |           |               |
|--------------------------|---------------------|-----------|---------------|
| Residue                  | Distance D-H--A (Å) | Angle (°) | H-bond donor? |
| HIS 366                  | 0.91                | 162       | No            |
| ASN 375                  | 0.63                | 120.95    | Yes           |
| MET 439                  | 0.81                | 140.25    | Yes           |
| ASN 602                  | 0.73                | 131.99    | Yes           |
| Hydrophobic interactions |                     |           |               |
| Residue                  | Distance (Å)        | Angle (°) | Type          |
| MET 439                  | 3.61                | NA        | NA            |

\*D – donor, A – acceptor, NA – not applicable .
